# Supplementary material for: The female-specific Doublesex isoform regulates pleiotropic transcription factors to pattern genital development inDrosophila
Source: Oxford University Press journal article supplement (doi:10.1242/dev.055731), 2011-02-22
Supplement: dev055731tables6.pdf [file dev055731tables6.pdf]

**Table S6. Mean number of matches to the consensus Dsx binding sequence per significant and non-significant gene**

| Category                     | Distance from gene*   |                       |                        |                       |                       |
|------------------------------|-----------------------|-----------------------|------------------------|-----------------------|-----------------------|
|                              | ≤500 bp               | ≤1000 bp              | ≤2000 bp               | ≤5000 bp              | ≤10,000 bp            |
| <b>L3</b>                    |                       |                       |                        |                       |                       |
| Significant                  | 2.18                  | 2.24                  | 2.38                   | 2.76                  | 3.60                  |
| Non-significant              | 0.79                  | 0.85                  | 1.01                   | 1.58                  | 2.68                  |
| <i>P</i> -value <sup>†</sup> | $1.23 \times 10^{-7}$ | $2.55 \times 10^{-6}$ | $6.01 \times 10^{-5}$  | $1.16 \times 10^{-2}$ | $2.53 \times 10^{-2}$ |
| <b>P6</b>                    |                       |                       |                        |                       |                       |
| Significant                  | 1.21                  | 1.28                  | 1.48                   | 2.04                  | 3.02                  |
| Non-significant              | 0.78                  | 0.85                  | 1.01                   | 1.58                  | 2.68                  |
| <i>P</i> -value              | $1.11 \times 10^{-8}$ | $2.38 \times 10^{-8}$ | $3.30 \times 10^{-8}$  | $1.35 \times 10^{-5}$ | $1.09 \times 10^{-2}$ |
| <b>P20</b>                   |                       |                       |                        |                       |                       |
| Significant                  | 1.15                  | 1.22                  | 1.46                   | 2.07                  | 3.20                  |
| Non-significant              | 0.78                  | 0.85                  | 1.00                   | 1.57                  | 2.67                  |
| <i>P</i> -value              | $6.34 \times 10^{-4}$ | $4.02 \times 10^{-4}$ | $4.06 \times 10^{-6}$  | $1.30 \times 10^{-5}$ | $2.36 \times 10^{-4}$ |
| <b>ALL<sup>‡</sup></b>       |                       |                       |                        |                       |                       |
| Significant                  | 1.16                  | 1.24                  | 1.45                   | 2.03                  | 3.09                  |
| Non-significant              | 0.78                  | 0.84                  | 1.00                   | 1.57                  | 2.67                  |
| <i>P</i> -value              | $7.58 \times 10^{-9}$ | $7.20 \times 10^{-9}$ | $1.74 \times 10^{-10}$ | $2.49 \times 10^{-8}$ | $9.83 \times 10^{-5}$ |

\*Only non-coding sequences are considered. If a match to the consensus Dsx binding sequence lies between the start and end of a gene (as annotated in FlyBase R5.29), its distance is recorded as 0 bp. Otherwise, its distance is recorded as the number of bp between it and the start of the gene.

<sup>†</sup>The *P*-value is based on a two-sided Wilcoxon rank sum test of the hypothesis that the number of matches is the same for 'significant' (differentially expressed at FDR threshold of 0.05) and 'non-significant' (not differentially expressed at FDR threshold of 0.05) genes.

<sup>‡</sup>For the category 'ALL', 'significant' genes are those that are differentially expressed at FDR threshold of 0.05 at at least one developmental stage.
