# Supplementary figures and images for: The female-specific Doublesex isoform regulates pleiotropic transcription factors to pattern genital development inDrosophila
Source: Oxford University Press journal article supplement (doi:10.1242/dev.055731), 2011-02-22

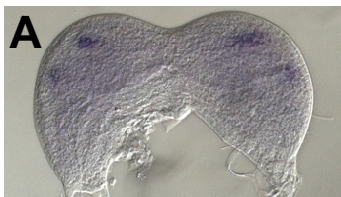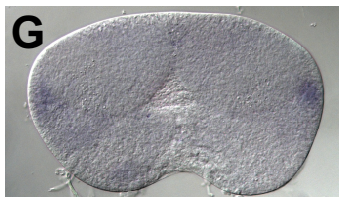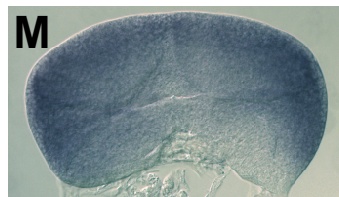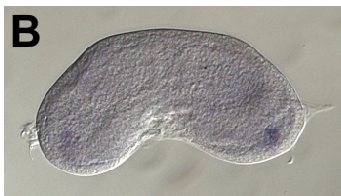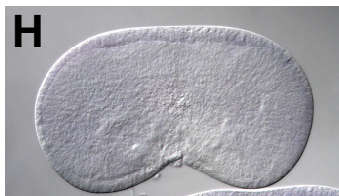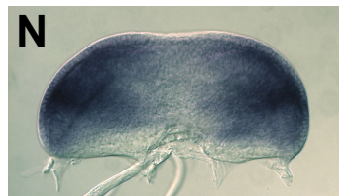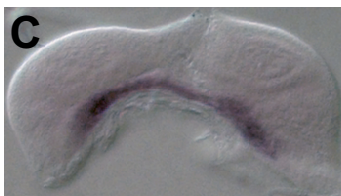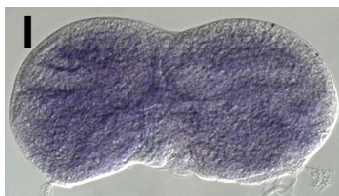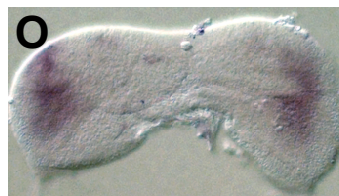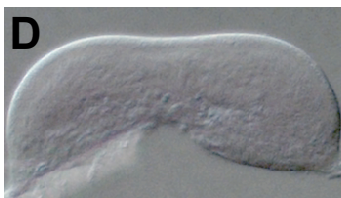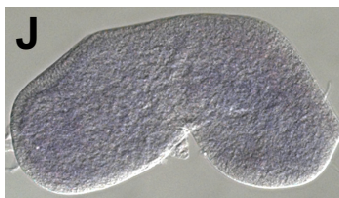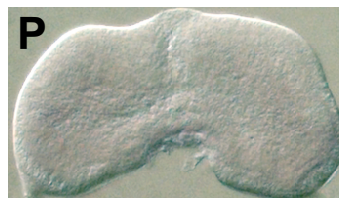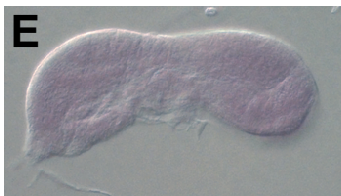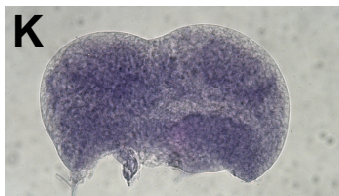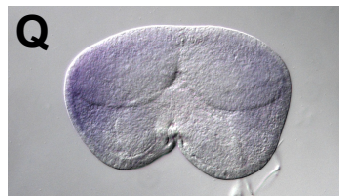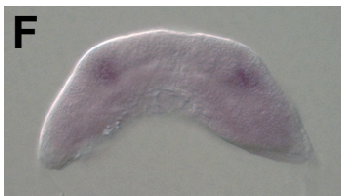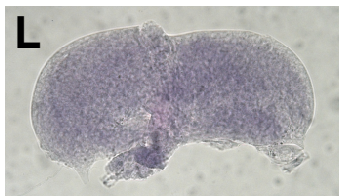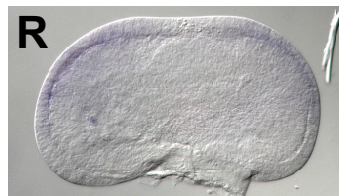

Supplement: dev055731figs1.pdf [file dev055731figs1.pdf]
